# Supplementary material
Source: Springer Nature journal article supplement (https://www.springermedizin.de/resource/supplementary/13756_2013_566_MOESM3_ESM.pdf/9682346)

## Per capita antibiotic use has decreased in Canada, the United States, and France, 2000-2010

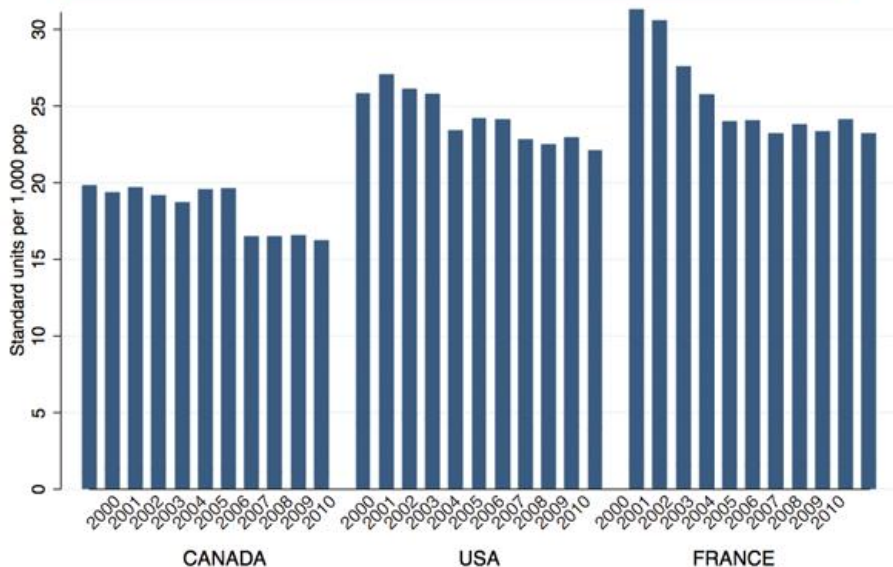

Data source: Based on data obtained under license from IMS Health (MIDAS) (January 2000 - December 2010); IMS Health Incorporated. All rights reserved.

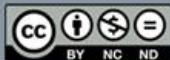

Supplement: MOESM3 [file 9682346]
